# Supplementary material
Source: publisher site journal article supplement (https://www.dovepress.com/article/385598)
Supplement: Supplementary file 1 [file get_supplementary_file.php]

**Electroconvulsive therapy practice in Thailand**

This is the translated version of the original Thai-language questionnaire used in the research.

**The questionnaire was developed to collect information about the current ECT practice in Thailand. Please answer each question with the information before the pandemic of coronavirus disease 2019 (COVID-19).**

**Sections:**

General information of the respondents

Section 1 Characteristic of ECT service

Section 2 ECT administration

Section 3 Anesthetic procedures

Section 4 ECT: Acute course

Section 5 ECT: Maintenance and continuation course

Section 6 Patient assessment

**General information** (7 questions)

1. Name of the respondent ............................................................................................................
2. Contact number .........................................................................................................................
3. Name of your hospital/center ....................................................................................................
4. What type of psychiatric facility your service is?

O General hospital

O Psychiatric hospital/mental institution

O University teaching hospital

O Private hospital

O Other (please specify) ...........................................................................................................

1. Total number of hospital bed .....................................................................................................
2. Total number of psychiatric bed (if there is none please put ‘0’) ..............................................
3. What is your role in ECT service?

**Section 1: Characteristic of ECT service** (10 questions)

1. Are there staffs responsible specifically in ECT service?

O yes O no

1. Do you have an ECT protocol or ECT guidelines in your facility?

O yes O no

1. Is ECT applied on the following populations? (Tick all applicable)

O Children under 12 years old

O Adolescents between 13 – 17 years old

O Pregnant women

O Eldery older than 65 years old

O none of these

1. Consent for ECT at your service is mostly given by (tick all applicable):

O Patient

O Family member

O Psychiatrist

O Consent is not required

O Other (please specify) ...........................................................................................................

1. Where is the ECT performed? (Tick all applicable)

O ECT Unit

O Operation room (OR)

O Recovery room

O Inpatient department (IPD)

O Outpatient department (OPD)

O Other (please specify) ...........................................................................................................

1. Indication for ECT (tick all applicable):

O Drug resistance

O High suicide risk

O Severe aggression

O Poor oral intake

O History of good response to ECT

O Medical intolerance

O Other (please specify) ...........................................................................................................

1. From question no.6, please choose the most common indication in your facility

O Drug resistance

O High suicide risk

O Severe aggression

O Poor oral intake

O History of good response to ECT

O Medical intolerance

O Other (please specify) ...........................................................................................................

1. Main clinical diagnosis to prescribe ECT (Please specify average number of patient (per year) in each diagnosis. If none, please put ‘0’)

- Unipolar: major depression with psychosis ...........................person/year
- Unipolar: major depression without psychosis ...........................person/year
- Catatonia ...........................person/year
- Bipolar mood disorder: depressive ...........................person/year
- Bipolar mood disorder: mania ...........................person/year
- Bipolar mood disorder: mixed ...........................person/year
- Schizophrenia ...........................person/year
- Schizoaffective: depressive type ...........................person/year
- Schizoaffective: bipolar type ...........................person/year
- Obsessive-Compulsive Disorder ...........................person/year
- Substance use disorder ...........................person/year

1. Which test are done routinely before ECT? (Tick all applicable)

O CBC O Electrolyte

O BUN, Cr O LFT

O Anti-HIV O ECG

O CXR O Other (please specify) ........................................

1. How much is one session of ECT cost (including anesthetic and all medication)? ……..THB

**Section 2: ECT administration** (13 questions)

1. Who decides on the ECT treatment approach (electrode placement, dosing, etc.)? (Tick all applicable)

O Patient’s psychiatrist

O ECT psychiatrist (designated psychiatrist for ECT)

O Medical officer (non-psychiatrist)

O Other (please specify) ...........................................................................................................

1. Who applies the ECT stimulus?

O Psychiatrist O Psychiatric nurse

O Psychiatric resident O Medical officer (non-psychiatrist)

O Other (please specify) ...........................................................................................................

1. Which ECT machine do you use? (Tick all applicable)

O MECTA Spectrum 5000 M

O MECTA Spectrum 5000 Q

O Thymatron DGX/System II

O Thymatron System IV

O Other (please specify) ...........................................................................................................

1. Please rank the most common electrode placement in your facility (most common 1, less common 4):

Rank

- Right Unilateral ...................................
- Left Unilateral ...................................
- Bifrontal ...................................
- Bitemporal ...................................

1. Please rank the most common type of pulse width in your ECT practice (most common 1, less common 2):

Rank

- 0.5 – 1 ms ...................................
- 0.25 – 0.3 ms ...................................

1. How is the initial ECT dosing performed?

O By titration method based on seizure threshold

O By aged based method

O Other (please specify) ...........................................................................................................

1. What are the criteria for increasing ECT dose over treatment course? (Tick all applicable)

O Inadequate seizure

O unsatisfied clinical response

O No dose modification

O Other (please specify) ...........................................................................................................

1. What monitoring is performed during the ECT treatment (Tick all applicable)

O ECG O EEG

O Bispectral index (BIS) O Motor seizure

O BP/HR O Pulse oximetry

O CO2 monitoring O Other (please specify) ........................................

1. Is there a guideline of medication management for ECT course?

O yes O no, depend on clinician’s judgement

1. Which medication are usually withdrawn prior to the start of ECT course? (Tick all applicable)

O Antidepressants O Antipsychotics

O Lithium O Anticonvulsants

O Benzodiazepine O no guideline of management

O Other (please specify) ...........................................................................................................

1. Are medications changed during ECT course?

O yes O no

1. Type of ECT in your facility:

O Modified ECT *(do not answer question no.13, please move to the next section)*

O Unmodified ECT

O Both types

1. What are the reasons for using unmodified ECT? (Tick all applicable)

O Lack of anesthesiologists

O More cost efficient

O Lack of equipment

O Patients’ risks of anesthesia

O Incapable of managing anesthetic complications

O Less time consuming

O Other (please specify) ...........................................................................................................

**Section 3: Anaesthetic procedures** (9 questions)

(If your facility perform on unmodified ECT, please skip this section)

1. Who does the pre-anesthetic assessment? (Tick all applicable)

O Anesthesiologist

O Anesthesiology nurses

O Other (please specify) ...........................................................................................................

1. Who performs anesthetic procedure? Tick all applicable)

O Anesthesiologist

O Anesthesiology nurses

O Other (please specify) ...........................................................................................................

1. Which anesthetics do you use? (tick all applicable)

O Propofol O Thiopentone

O Ketamine O Etomidate

O Other (please specify) ...........................................................................................................

1. Which is the most used anesthetic?

O Propofol O Thiopentone

O Ketamine O Etomidate

O Other (please specify) ...........................................................................................................

1. Which muscle relaxant do you use?

O Succinylcholine

O Other (please specify) ...........................................................................................................

1. Is pre-oxygenation (prior to anesthetic induction) a part of anesthetic procedure?

O yes O no

1. Is hyperventilation (prior to ECT stimulus) a part of the anesthetic procedure?

O yes O no

1. Is endotracheal intubation performed before ECT?

O yes O no (skip question no.9)

1. Please specify the indication in which endotracheal intubation was performed

............................................................................................................................................................................................................................................................................................................................................................................................................................................................

**Section 4: ECT – Acute course** (9 questions)

1. How many sessions on average are administered in the acute course?

O 1 – 3 sessions O 10 – 12 sessions
O 7 – 9 sessions O more than 12 sessions

O 4 – 6 sessions

1. How many sessions on average are administered in the acute course for schizophrenia and/or schizoaffective?

O 1 – 3 sessions O 10 – 12 sessions
O 7 – 9 sessions O more than 12 sessions

O 4 – 6 sessions

1. How many sessions on average are administered in the acute course for major depressive disorder?

O 1 – 3 sessions O 10 – 12 sessions
O 7 – 9 sessions O more than 12 sessions

O 4 – 6 sessions

1. How many sessions on average are administered in the acute course for bipolar disorder, *mania episode*)?

O 1 – 3 sessions O 10 – 12 sessions
O 7 – 9 sessions O more than 12 sessions

O 4 – 6 sessions

1. How many sessions on average are administered in the acute course for bipolar disorder, *depressive episode*)?

O 1 – 3 sessions O 10 – 12 sessions
O 7 – 9 sessions O more than 12 sessions

O 4 – 6 sessions

1. What is the most typical frequency for acute ECT in your facility?

O 3 sessions per week

O 2 sessions per week

O Other (please specify) ...........................................................................................................

1. What number of sessions is typically given before ECT is considered ineffective? ...........................................................................................................sessions
2. When is ECT stopped? (Tick all applicable)

O Clinical improved

O Reaching plateau effect

O Not response to ECT

O Intolerable side effects

O Other (please specify) ...........................................................................................................

1. From question no.8, which is the most common reason for discontinuation of

O Clinical improved

O Reaching plateau effect

O Not response to ECT

O Intolerable side effects

O Other (please specify) ...........................................................................................................

**Section 5: ECT – Maintenance and continuation course** (4 questions)

1. Is continuation/maintenance ECT prescribed in your facility?

O yes O no (If no, skip this section)

1. What are the the main diagnosis for continuation/maintenance ECT? (Tick all applicable)

O Unipolar depression

O Schizophrenia

O Bipolar disorder

O Schizoaffective disorder

O Secondary psychiatric disorder (organic psychiatric disorder)

1. Is there a protocol in performing continuation/maintenance ECT?

O yes (fixed protocol)

O no, depends on clinician’s judgement or patient’s clinical state

1. When is continuation/maintenance ECT stopped?

O 6 months to 1 year

O more than a year

O no specific time

O Other (please specify) ...........................................................................................................

**Section 6: Patient assessment** (6 questions)

1. Do you use formal rating scales (e.g., MARDS, YMRS, CGI, BPRS) to assess the clinical state of patients receiving ECT? (Tick all applicable)

O No

O yes, pre-ECT

O yes, post-ECT

1. If Yes for Pre-ECT formal rating scales to assess the clinical state of patients receiving ECT, which rating scale? ....................................................................................................................................................
2. If Yes for Post-ECT formal rating scales to assess the clinical state of patients receiving ECT, which rating scale?

....................................................................................................................................................

1. What formal rating scales are used to monitor cognition during the ECT course

O MMSE

O MoCA

O None

O Other (please specify) ...........................................................................................................

1. In your experience, what are side effects found from ECT? (Tick all applicable)

O Cognitive side effect

O Headache

O Falling

O Myalgia

O Oral cavity trauma

O Bone fracture

O Delirium

O Cardiovascular problem (e.g., hypertensive crisis, tachycardia, etc.)

O Death

O Other (please specify) ...........................................................................................................

1. From question no.5, what is the most common side effect?

O Cognitive side effect

O Headache

O Falling

O Myalgia

O Oral cavity trauma

O Bone fracture

O Delirium

O Cardiovascular problem (e.g., hypertensive crisis, tachycardia, etc.)

O Death

O Other (please specify) ...........................................................................................................
